# Supplementary material
Source: publisher figshare collection journal article supplement (https://acs.figshare.com/ndownloader/files/4370749)
Supplement: Supplementary file 1 [file 4370749]

## Supporting Information

Figure 1: Bacterial two hybrid screens to show interaction of PfMSP-1 and PfRhopH3-C terminus. (A) Agarose gel showing PCR amplified products corresponding to insert in pTRG vector in *E. coli* cotransformants selected on 5 mM 3-AT and streptomycin plates by bacterial two-hybrid screening of *P. falciparum* cDNA library. Lane 1: Marker, Lane 2-12: PCR products. (B) The protein sequence corresponding to PCR product in clone 7 and 8 showed similarity with C-terminal of PfRhopH3.

Figure 2: Immunofluorescence assay to show localization of PfRhopH3-C in rhoptries. (i) Co-localization of PfRhopH3 and PfClag3.1 using their respective antibodies at schizont (S) and free merozoites (M) stages. Staining with preimmune sera and anti-GST antibodies respectively were used as controls. The parasite nuclei were stained with DAPI (blue). PfRhopH3 and PfClag3.1 were localized at the apical tip.

Figure 3: Components of PfMSP-1 associated complex are absent at *P. falciparum* ring stage. Immunofluorescence assay was done using anti-PfMSP-1<sup>42</sup>, anti-PfRAP-1 and anti-PfRhopH3 antibodies at ring stage of the parasite. No staining was detected for PfRhopH3 and PfRAP-1, while a weak staining was seen for PfMSP-1 protein.

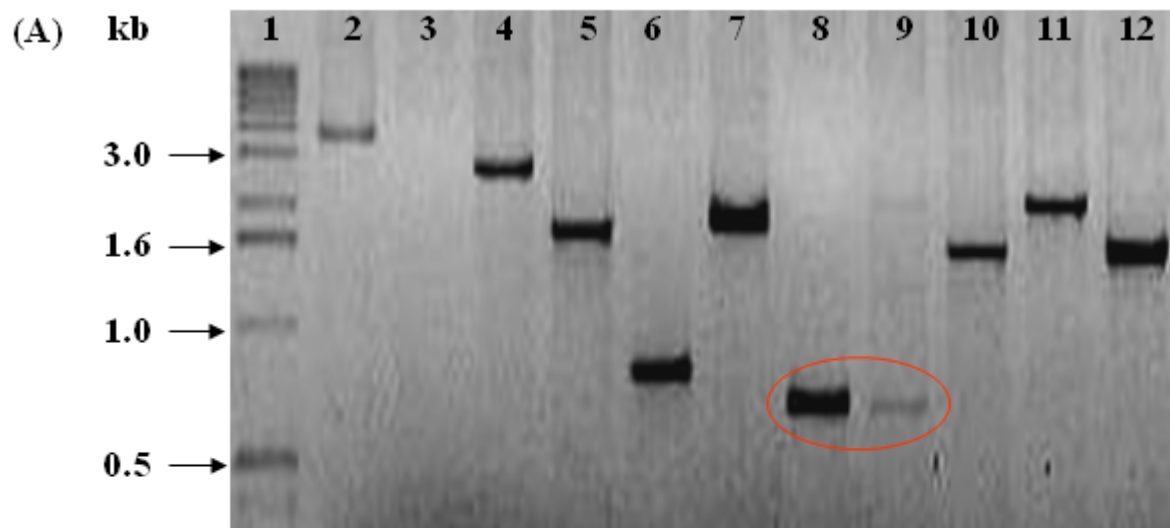

(B) **DKPQTMDEASYEETVDEDAHHVNEKQHSAHFLDAIAEKDILEEK  
TKDQDLEIELYKYMGPLKEQSKSTSAASTSDEISGSEGPSTESTST  
GNQGEDKTTDNTYKEMEELAEAGTSNLKKGLEFYKSSLKLDQL**

**Supplemental Figure 1**

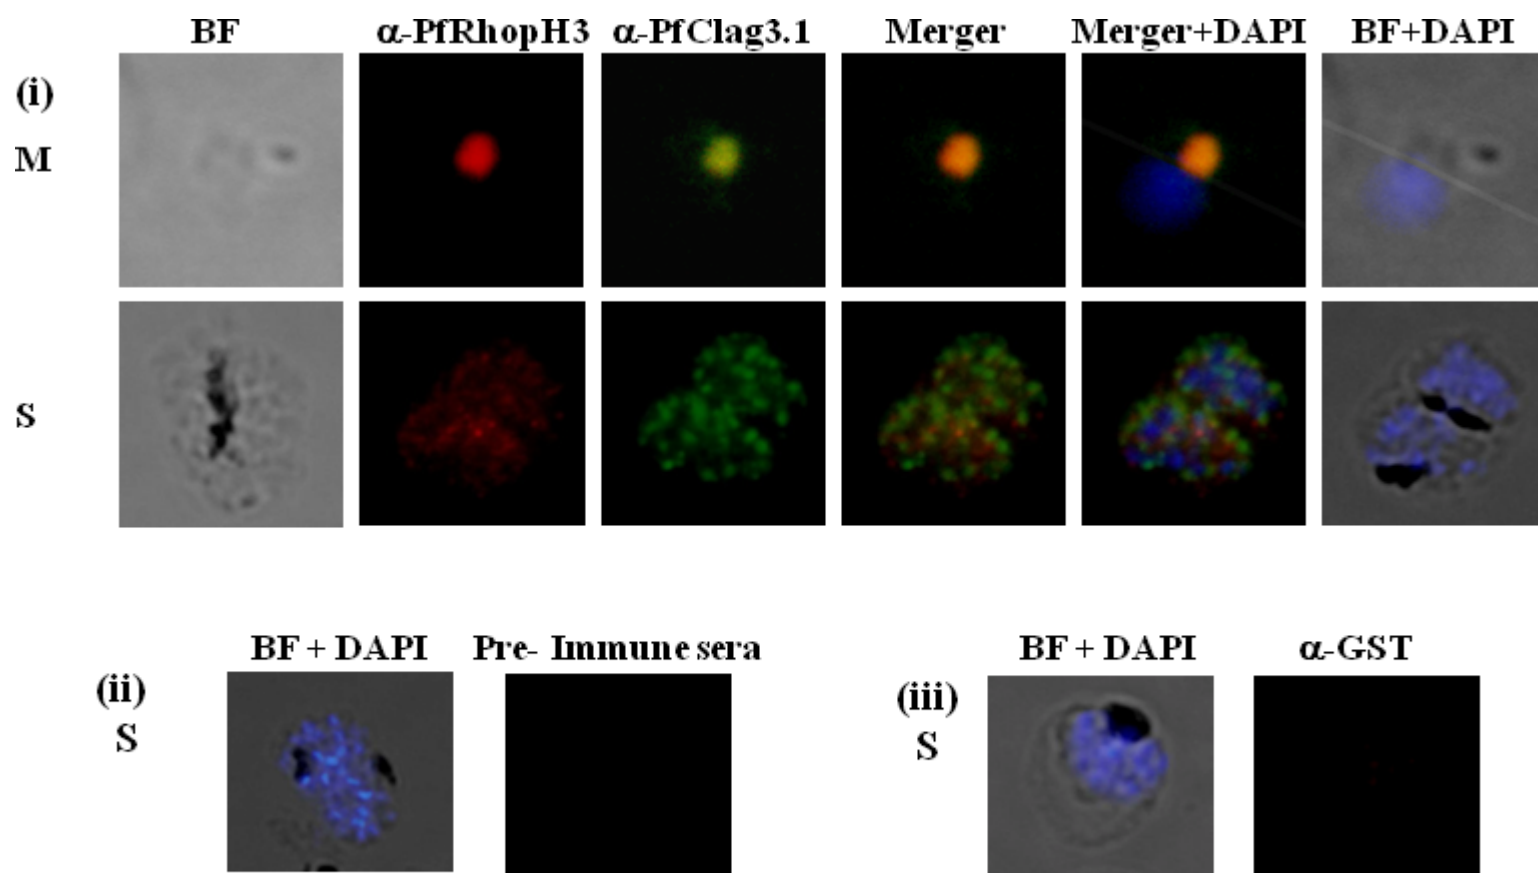

Supplemental Figure 2

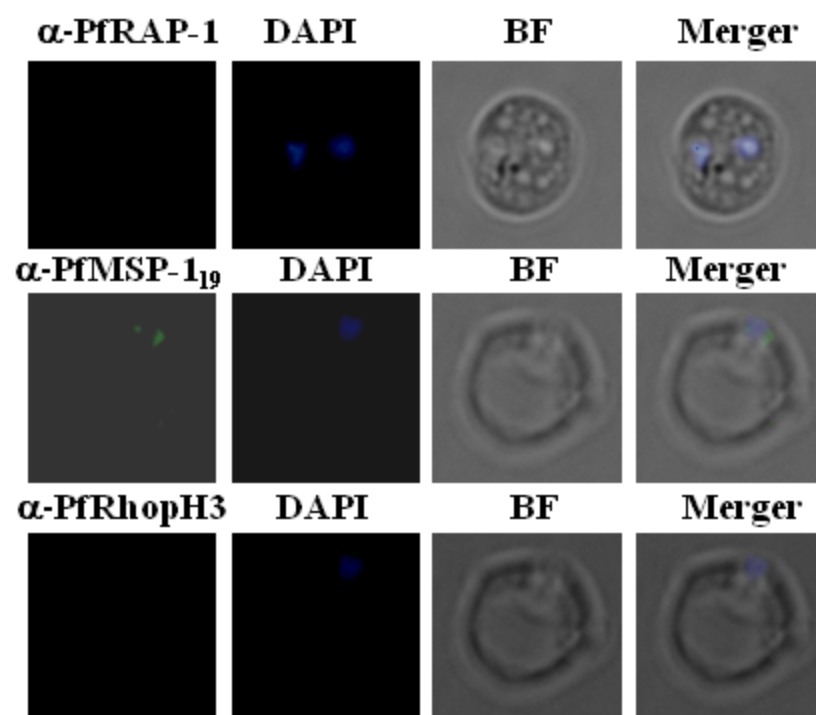

Supplemental Figure 3
